# Supplementary material for: Diagnosis of idiopathic amyotrophic lateral sclerosis using Fourier-transform infrared spectroscopic analysis of patient-derived skin
Source: Royal Society of Chemistry journal article supplement (doi:10.1039/c9an02282a), 2020-01-01
Supplement: c9an02282a1.pdf [file c9an02282a1.pdf]

a)

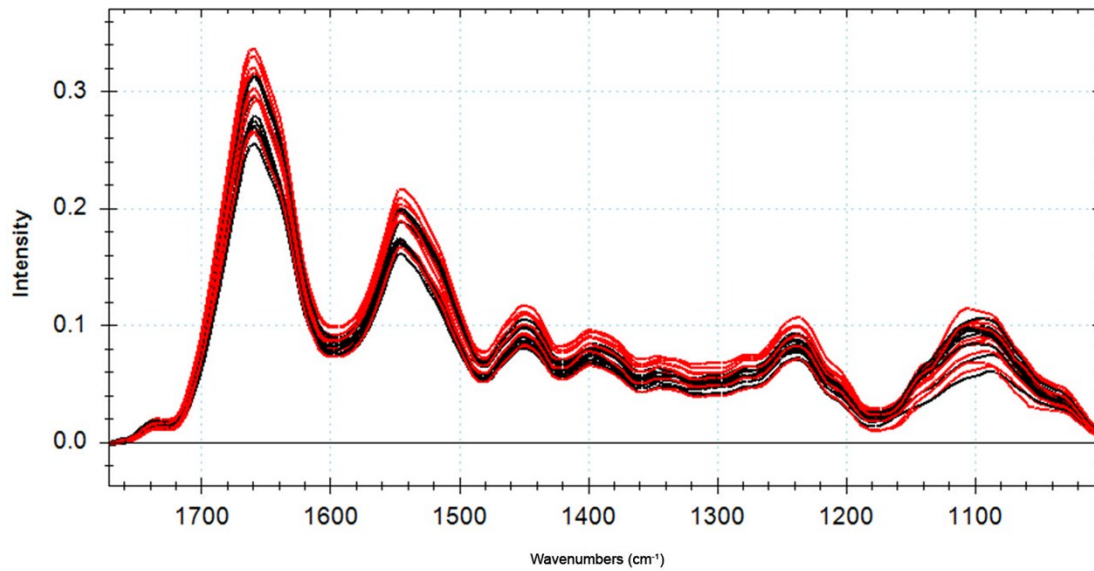

b)

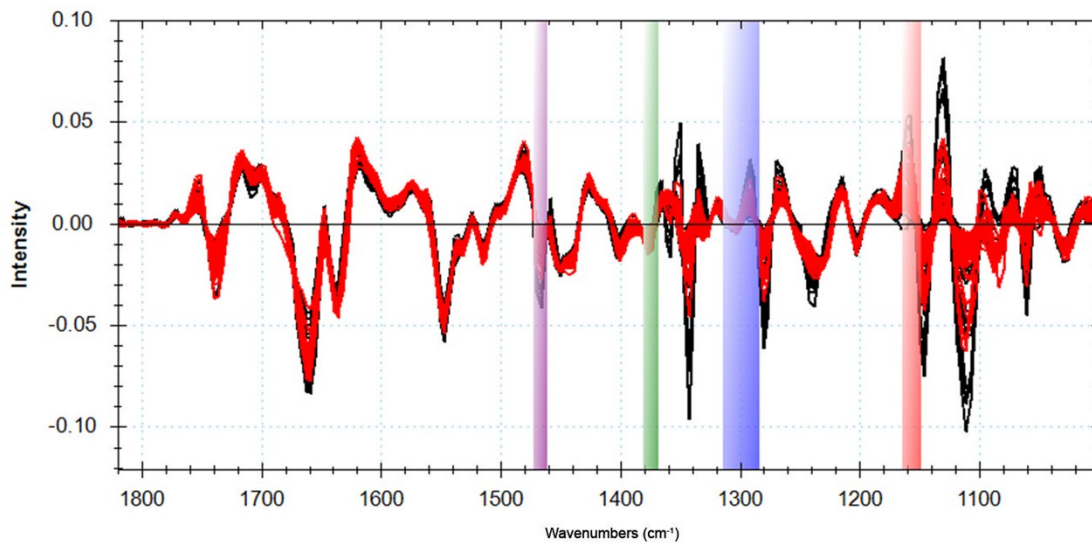

**Supplementary Figure 2: Absorbance intensities FTIR spectra variability recorded from the generated tissue-engineered skins.**

A) Overlay FTIR spectra from different tissue-engineered skins. B) Second derivative FTIR spectra calculated from the upper panel (A).

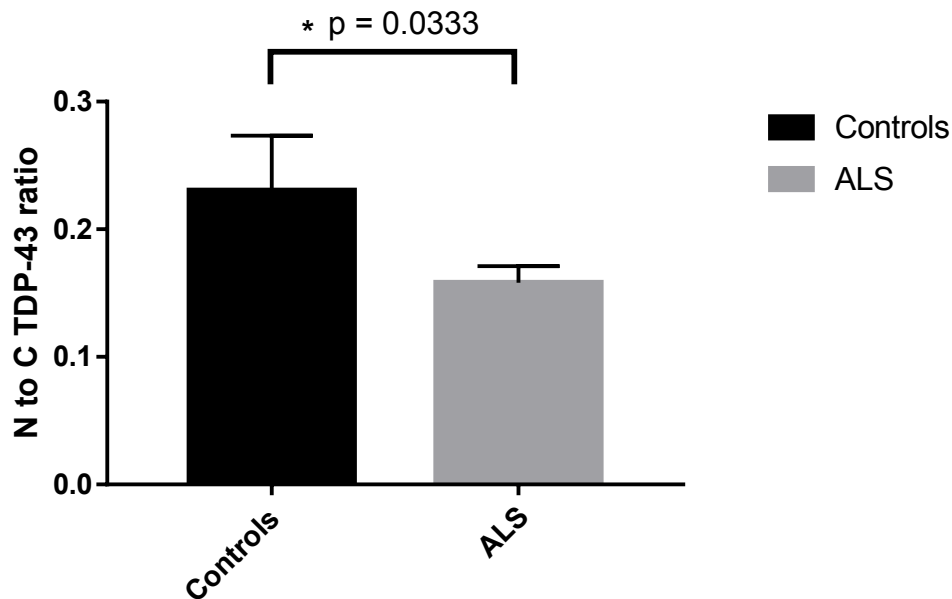

**Supplementary Figure 3: Increased cytoplasmic aggregated TDP-43 with anti-parallel  $\beta$ -sheet structures in ALS-derived TES quantified by ELISA.**

For each sample, the amount of TDP-43 was normalised over the total protein content of the fraction and the ratio of the nuclear fraction over the cytoplasm fraction was calculated. A smaller nuclear to cytoplasm ratio indicates TDP-43 delocalization from the nucleus to the cytoplasm, a well-known pathological signature of ALS. Data is reported as mean  $\pm$  SEM. Statistically significant smaller nuclear to cytoplasm ration can be observed in ALS-derived TES as expected (one tailed Mann-Whitney,  $p = 0,0333$ ).

**Supplementary Table 1:** Parameters of the different absorbance filters used for spectra filtering and their purpose

| Region<br>cm <sup>-1</sup> | Minimum<br>abs.<br>Au. | Maximum<br>abs.<br>Au | Purpose                                                                                               |
|----------------------------|------------------------|-----------------------|-------------------------------------------------------------------------------------------------------|
| 1700-1600<br>(Amide I)     | 0,2                    | 0,9                   | To remove the spectra from regions within the TES that are too thin (< 0.1 Au) or too thick (>0.9 Au) |
| 1780-1730                  | 0,0                    | 0,1                   | To remove spectra associated with the presence of OCT.                                                |
